# Supplementary material
Source: HighWire-hosted journal article supplement (doi:10.1101/rna.080804.125)
Supplement: Supplemental_Figure_Legends.docx [file Supplemental_Figure_Legends.docx]

**Supplemental Figure Legends**

**Figure S1: Cluster expression, but not genes or piRNAs, decrease with heat shock**

A. Density scatter plots comparing gene expression (rpkm, log10 scale) in *w1* control vs. samples heat shocked at 37°C for 1 hour and allowed to recover for 1, 12, 24, 48, and 72 hours. Red dots are the HSP genes. Dotted line is a 2-fold change.

B. All mapping long RNA signal tracks (ppm) for cluster 42AB in *w1* control, *w1* heat shocked for 1 hour at 37°C allowed to recover for 1 hour, 12 hours, 24 hours, 48 hours, and 72 hours. Heat shocked samples show overexpression at embedded elements maximally at 1 hour, and this expression decreases with time.

C. Scatter plot comparing all anti-sense piRNAs mapping to transposon families (rpkm, log10 scale), piRNAs uniquely mapping to clusters (rpkm, log10 scale), and piRNAs z-score (log2 scale), a measure of the enrichment of ping-pong piRNA pairs, in *w1* control vs. *w1* samples heat shocked at 37°C for 1 hour and allowed to recover for 1 hour. The dotted line is a 2-fold change. The red dot is the major cluster 42AB.

D. Scatter plot comparing unique mapping piRNA clusters transcript expression (rpkm, log10 scale) in *w1* control vs. samples heat shocked at 37°C for 1 hour and allowed to recover for 1, 12, 24, 48, and 72 hours. The dotted line is 2-fold change, the red dot is the major cluster 42AB. Most lowly expressed clusters show a trend towards reduced expression which recovers with time.

**Figure S2: Absolute temperature matters in displacing Rhino foci**

A. Scatter plots compare CUT&RUN sequencing enrichment for anti-rabbit IgG controls vs anti-H3K9me3 for flies that were not heat shocked (left) and heat shocked for 1 hour at 37°C with 1 hour recovery (right). Each point represents a piRNA cluster with Cluster 42AB highlighted in orange. Red points are more than 2 fold enriched for H3K9me3 while blue points indicate more than 2 fold dienriched for H3K9me3. Dotted lines represent two fold difference. Almost all piRNA clusters are enriched for H3K9me3 marks and both heat shocked and not heat shock flies.

B. Scatter plots directly compare CUT&RUN enrichment for H3K9me3 without heat shock to heat shocked flies allowed to recover for 1 hour (left) or 24 hours (right). Dotted lines represent two fold difference. Each point represents a piRNA cluster with Cluster 42AB highlighted in orange. Enrichment of H3K9me3 marks at clusters with and without heat shock appear comparable even with longer recovery times.

C and D. CUT&RUN sequencing experiments were used to look for H3K27me3 enrichment at piRNA clusters with and without heat shock similar to above. The scatter plots show the same comparisons as above but looks at H3K27me3 enrichment as opposed to H3K9me3. Many piRNA clusters show enrichment for H3K27me3 and this enrichment remains unchanged after heat shock.

E. Live confocal images of GFP-Rhi dissected egg chambers heat shocked for 1 hour for the indicated temperature compared to no heat shock controls. Heat shock at 34°C shows no loss of Rhino foci, whereas 35°C loses Rhino localization. Rhino foci return with 1 hour of recovery after heat shock at 35°C for 1 hour. The white box highlights a single nurse cell nucleus and is digitally zoomed in below. White arrow heads highlight some Rhino foci. Scale bar is 10 μm.

F. Live confocal images of GFP-Rhi dissected egg chambers from flies raised at 18°C heat shocked for 1 hour at 30°C and no heat shock control. Heat shock at 30°Cshows no loss of Rhino foci. The white box shows a single nurse cell nucleus and is digitally zoomed in blow. Scale bar is 10 μm.

**Figure S3:** **Disassembly and reassembly of other piRNA precursor proteins involved in transcription and export.**

A. Confocal images of a nurse cell nucleus labeled for Deadlock (anti-Del) from wildtype flies expressing GFP-Cuff. Flies were either subjected to heat shocked at 37°C for 30 minutes or no heat shock controls. Arrows point at Del foci in control which were not present after 30 minutes of heat shock. Scale bar is 2 μm.

B. Scatterplot comparing the normalized signal of Rhino and GPF-Cuff foci heat shock at 37°C for an hour and allowed to recover for 3 hours and 45 minutes. As previously shown in Figure 3J, most nuclei 4 hours post heat shock have little to no Rhino localized. Therefore, this analysis, only used nuclei that contained Rhino location to puncta to determine whether the Cuff also recovered at this time. Each point represents a focus of Rhino or GFP-Cuff five standard deviations above the background with the signal normalized to the maximum fluorescence in control. 1 μm optical z-sections for minimally 4 nurse cell nuclei were used for this quantification. Rhino and GFP-Cuff colocalize similarly to no shock control indicating that Rhino and Cuff recover together.

C. Confocal images of a nurse cell nucleus expressing GFP-Cuff used for the quantification in S3B labeled for GFP-Cuff (anti-GFP, Red) Rhino (anti-Rhino, Green) and merge. Flies were heat shocked for 1 hour at 37°C and allowed to recover for 3 hours and 45 minutes. Arrows pointing at a focus in the inset, which shows colocalized GFP-Cuff and Rhino signal. Scale bar is 2 μm.

D. Confocal images of an egg chamber expressing Venus-UAP56 before heat shock, 1, and 6 hours after heat shock at 37°C for 1 hour. Venus-UAP56 (anti-GFP, red) Rhino (anti-Rhino, green) and merge are shown and arrow head point to a focus found in the inset. No heat shock control shows colocalized Venus-UAP56 and Rhino signal. One hour after a heat shock at 37°C for 1 hour, only Venus-UAP56 signal is visible. Six hours after heat shock, colocalized Venus-UAP56 and Rhino signal is visible (open arrow, top right insert), and Rhino signal without UAP56 is also visible (filled arrow, upper left inset). Scale bar is 10 μm.

**Figure S4****: Heat Shock alters the localization of two other piRNA pathway proteins, Squash and Maelstrom.**

A. Confocal images of a *w1* egg chamber stained for the piRNA pathway proteins Squash (anti-squash, green) and Ago3 (anti-ago3, red) in control and heat shocked at 37°C for 1 hour with 1 hour recovery. Squash loses localization to nuage after heat shock, while Ago3 appears unaffected. Scale bar is 10 μm.

B. Confocal images of a GFP-Maelstrom expressing egg chamber stained for anti-GFP in no heat shock control and heat shocked at 37°C for 1 hour with 1 hour recovery. Maelstrom is generally cytoplasmic in control, and this cytoplasmic signal is confined to the nuclear periphery after heat shock. Scale bar is 10 μm.

C. Confocal images of a *w1* egg chamber stained for the piRNA pathway protein Armi-GFP in no heat shock control and heat shocked at 37°C for 1 hour with 1 hour recovery. Armi shows both nuage and mitochondrial staining in both control and after heat shock. Scale bar is 10 μm.

**Figure S5: Mutants in *panx* and *uap56* do not affect the speed of Rhino foci recovery**

A and B. Confocal images of egg chambers stained for Rhino in *panxM/dDf* mutants (A) and *uap56sz15/28*mutants (B) in no heat shock control, and 2, 4, and 6 hours after a 1 hour 37°C heat shock. For clarity, nurse cell nuclei in the field of view were identified using DAPI signal and outlined in white. Two hours after heat shock, nuclei show no Rhino foci in both genotypes. Some nuclei show a few Rhino foci four hours after heat shock for *panxM/dDf* mutants while Rhino remained absent in *uap56sz15/28*mutants. Both mutants showed multiple Rhino foci after six hours after heat shock. Scale bar is 10 μm.

**Figure S6:** **Maternal 42AB piRNAs are not required for licensing rhino binding in *w1,*and multi-mapping piRNAs do not generate Rhino binding.**

A. Experimental Crosses using *w1*as the wildtype strain crossed to *42AB Df* in both directions to generate genetically identical F1 that differ only in the pool of maternal piRNAs inherited.

B. Unique mapping small RNA reads mapping to 42AB cluster from the above F1 with and without uniquely mapping maternal piRNAs against 42AB Cluster

C. CUT&RUN signal from the above F1 for anti-IgG control and anti-Rhino at 42AB cluster.

D. Example scatter plot comparing unique piRNA expression (rpkm log10) for each piRNA cluster between the two F1 progeny with and without maternal 42AB piRNAs.

E. Example scatter plot comparing all mapping piRNA expression (rpkm log10) for each transposon family between the two F1 progeny with and without maternal 42AB piRNAs.

F. Genome browser view of the repetitive genomic region surrounding the alpha gamma-element. Tracks display multi mapping piRNAs, unique mapping piRNAs and CUT&RUN signal for ♀OreR x ♂42ABDf F1 (+/42AB Df) and 42ABDf x ♂OreR F1 (42AB Df/+). Both F1 populations show abundant multi-mapping piRNAs with little uniquely mapping piRNAs to this region. Despite the abundance of multi-mapping piRNAs, CUT&RUN experiments for Rhino show no enrichment for this region relative to IgG controls.

**Figure S7: Female egg production and egg hatch rate unaffected by heat shock**

A. To determine whether heat shock at 37°C for 1 hour affected female egg production, eggs from 5-6 females were collected for between 0-24 hours and 24-48 hours post heat shock (HS) and no heat shock controls. The total number of eggs were counted, and the number of eggs produced per female were calculated (n=3). No statistical difference in egg production was observed between no heat shock and heat shocked flies. P-values are indicated with n.s. designating not significant.

B. Eggs collected between 0-24 hours post heat shock and no heat shock controls from the experiment above were allowed to hatch for 24 hours. The number of eggs hatched were counted and the percent eggs hatched are displayed in the bar graph (n=3). There was not statistical difference in the percent of eggs hatched with an without heat shock. P-values are indicated with n.s. designating not significant.
